# Supplementary material for: Bioinformatics analysis of prognostic value and immunological role of MeCP2 in pan-cancer
Source: Springer Nature journal article supplement (doi:10.1038/s41598-022-21328-8), 2022-11-02
Supplement: MOESM1 [file 41598_2022_21328_MOESM1_ESM.pdf]

## SUPPLEMENTARY

### **Bioinformatics analysis of prognostic value and immunological role of MeCP2 in pan-cancer**

Yanfeng Wang<sup>1,2,†</sup>, Yunqing Zhang<sup>3,†</sup>, Fenghui Wang<sup>1,†</sup>, Ting Li<sup>5</sup>, Xinqiu Song<sup>1</sup>, Haiyan Shi<sup>1</sup>, Juan Du<sup>1</sup>, Huahua Zhang<sup>1</sup>, Hongmei Jing<sup>1</sup>, Jiaqi Han<sup>1</sup>, Dongdong Tong<sup>4,\*</sup> and Jing Zhang<sup>1,\*</sup>

†These authors contributed equally to this work.

1. Department of Cell Biology and Genetics, Medical College of Yan'an University, Yan'an 716000, Shaanxi Province, China.

2. Clinical Laboratory of Affiliated Hospital of Yan'an University, Yan'an 716000, Shaanxi Province, China.

3. Laboratory of Obstetrics and Gynecology, Affiliated Hospital of Yan'an University, Yan'an 716000, Shaanxi Province, China.

4. Department of Cell Biology and Genetics, School of Basic Medical Sciences, Xi'an Jiaotong University Health Science Center, Xi'an 710061, Shaanxi, China.

5. Department of Anesthesiology, Northwest Women's and Children's Hospital, Xi'an, Shaanxi, 710061, China.

\*Correspondence:

Jing Zhang

Department of Cell Biology and Genetics, Medical College of Yan'an University, No. 38, Guanghua road, Yan'an city, Shaanxi Province, 716000, People's Republic of China.

Tel/Fax: +86-0911-2650158

Email address: [yadxzj@163.com](mailto:yadxzj@163.com)

Dongdong Tong

Department of Cell Biology and Genetics, School of Basic Medical Sciences, Xi'an Jiaotong University Health Science Center, Shaanxi, Xi'an 710061, People's Republic of China. E-mail address: [tongdd@xjtu.edu.cn](mailto:tongdd@xjtu.edu.cn)

## SUPPLEMENTARY MATERIAL

S1

| Abbreviations | Tumor full name                                                  | Abbreviations | Tumor full name                         |
|---------------|------------------------------------------------------------------|---------------|-----------------------------------------|
| ACC           | Adrenocortical carcinoma                                         | LUAD          | Lung adenocarcinoma                     |
| BLCA          | Bladder urothelial carcinoma                                     | LUSC          | Lung squamous cell carcinoma            |
| BRCA          | Breast invasive carcinoma                                        | MESO          | Mesothelioma                            |
| CESC          | Cervical squamous cell carcinoma and endocervical adenocarcinoma | OV            | Ovarian serous cystadenocarcinoma       |
|               |                                                                  | PAAD          | Pancreatic adenocarcinoma               |
| CHOL          | Cholangiocarcinoma                                               | PCPG          | PCPG Pheochromocytoma and paraganglioma |
| COAD          | Colon adenocarcinoma                                             | PRAD          | Prostate adenocarcinoma                 |
| DLBC          | Lymphoid neoplasm diffuse large B-cell lymphoma                  | READ          | Rectum adenocarcinoma                   |
| ESCA          | Esophageal carcinoma                                             | SARC          | Sarcoma                                 |
| GBM           | Glioblastoma multiforme                                          | SKCM          | Skin cutaneous melanoma                 |
| HNSC          | Head and neck squamous cell carcinoma                            | STAD          | Stomach adenocarcinoma                  |
| KICH          | Kidney chromophobe                                               | TGCT          | Testicular germ cell tumors             |
| KIRC          | Kidney renal clear cell carcinoma                                | THCA          | Thyroid carcinoma                       |
| KIRP          | Kidney renal papillary cell carcinoma                            | THYM          | Thymoma                                 |
| LAML          | Acute myeloid leukemia                                           | UCEC          | Uterine corpus endometrial carcinoma    |
| LGG           | Brain lower grade glioma                                         | UCS           | Uterine carcinosarcoma                  |
| LIHC          | Liver hepatocellular carcinoma                                   | UVM           | Uveal melanoma                          |

**Figure S1.** The detail of 33 cancers abbreviations.

**A**

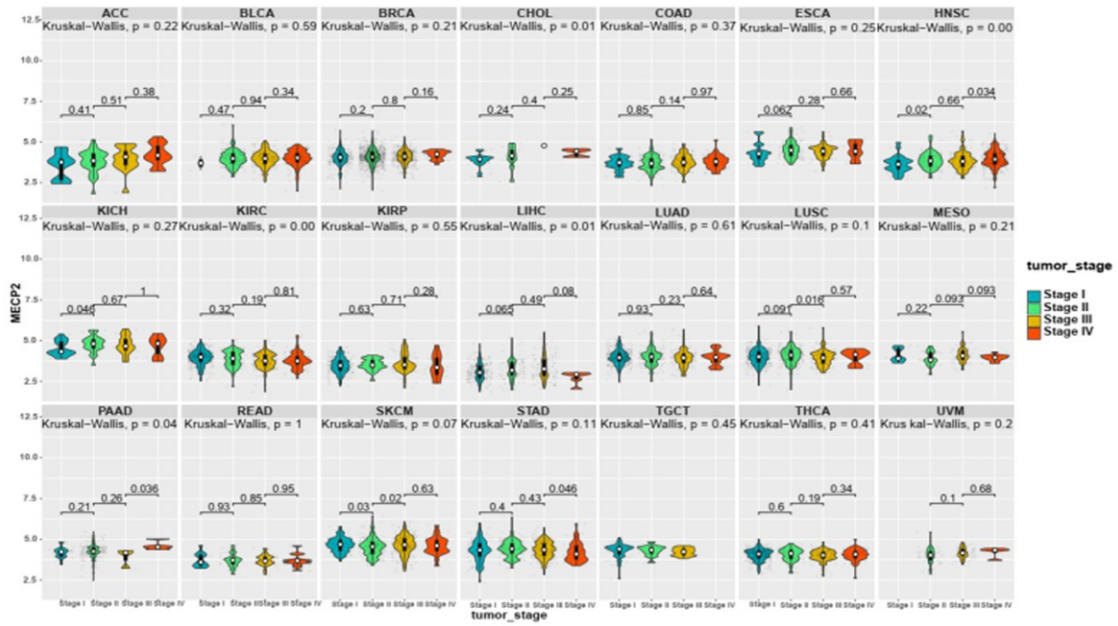

**B**

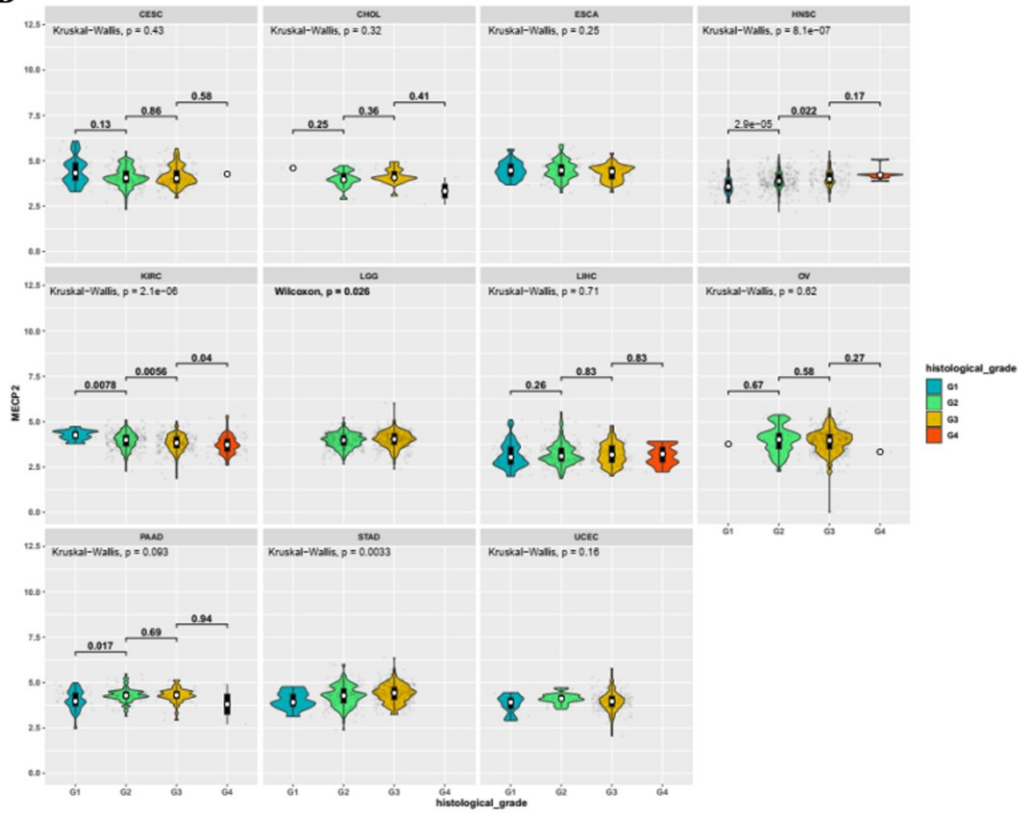

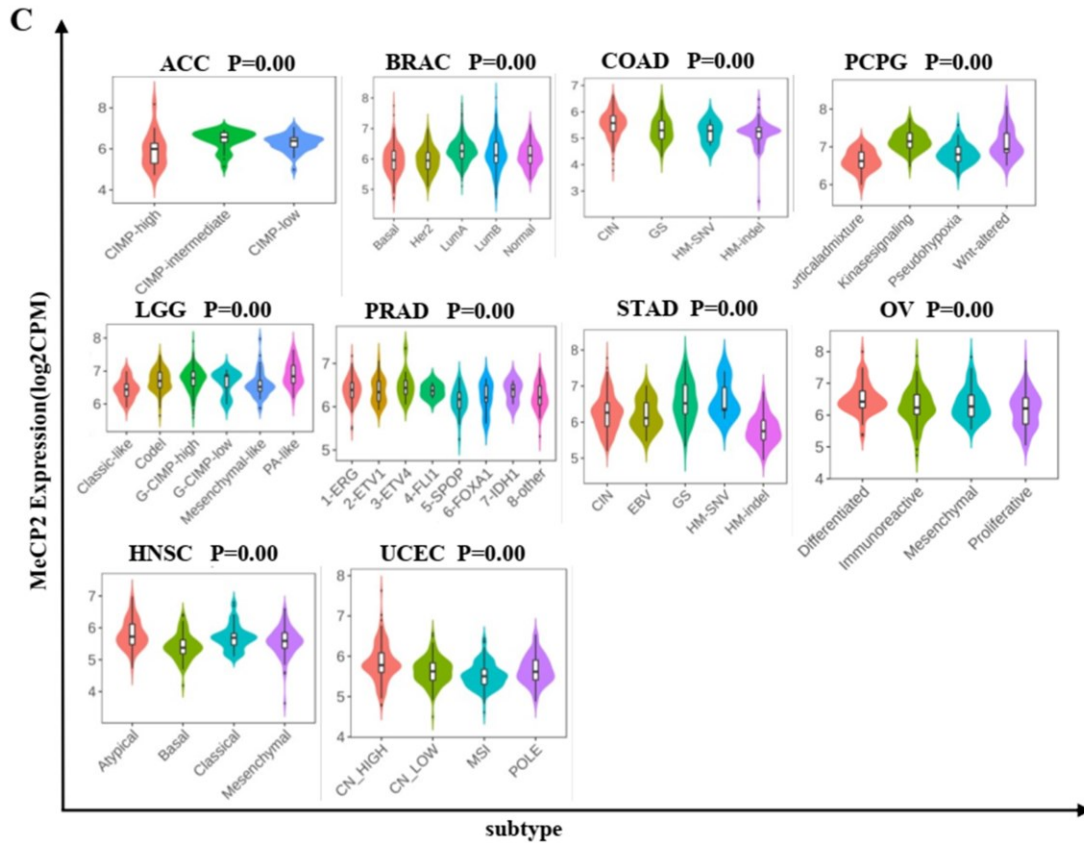

**Figure S2.** The MeCP2 expression correlated with stage, grade and subtype in pan-cancer. **(A)** High MeCP2 expression correlated with tumor stage in CHOL, HNSC, KIRC, LIHC and PAAD ( $P < 0.05$ ). **(B)** High MeCP2 expression correlated with histological grade in HNSC, KIRC, LGG and STAD ( $P < 0.05$ ). **(C)** High MeCP2 expression in different tumor subtypes in ACC, BRAC, COAD, PCPG, LGG, PRAD, STAD, OV, HNSC and UCEC ( $P < 0.05$ ).

**A**

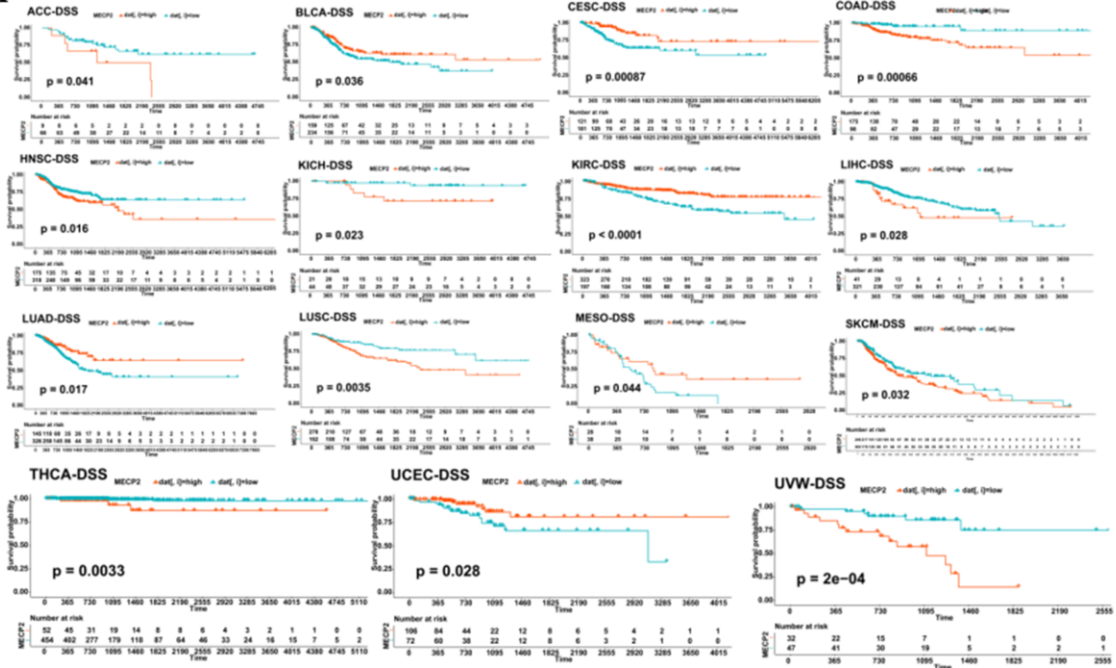

**B**

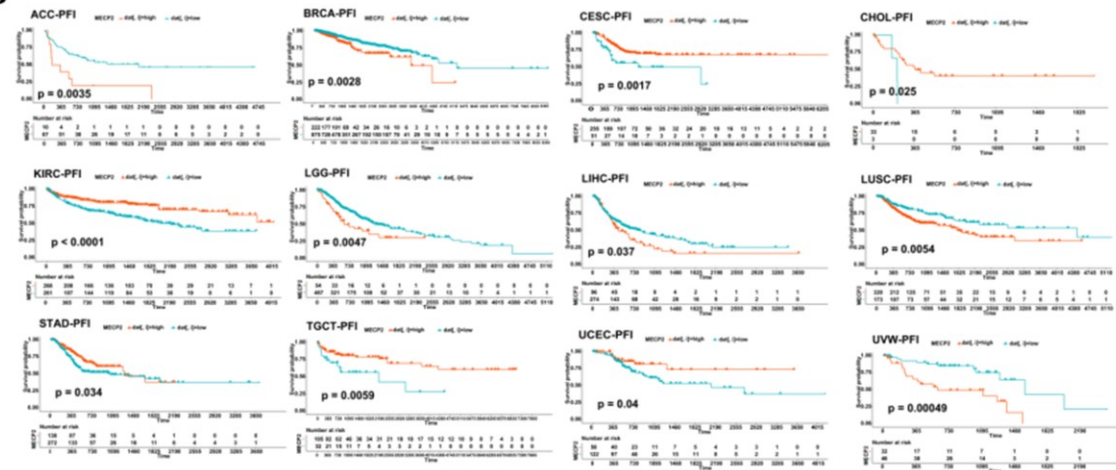

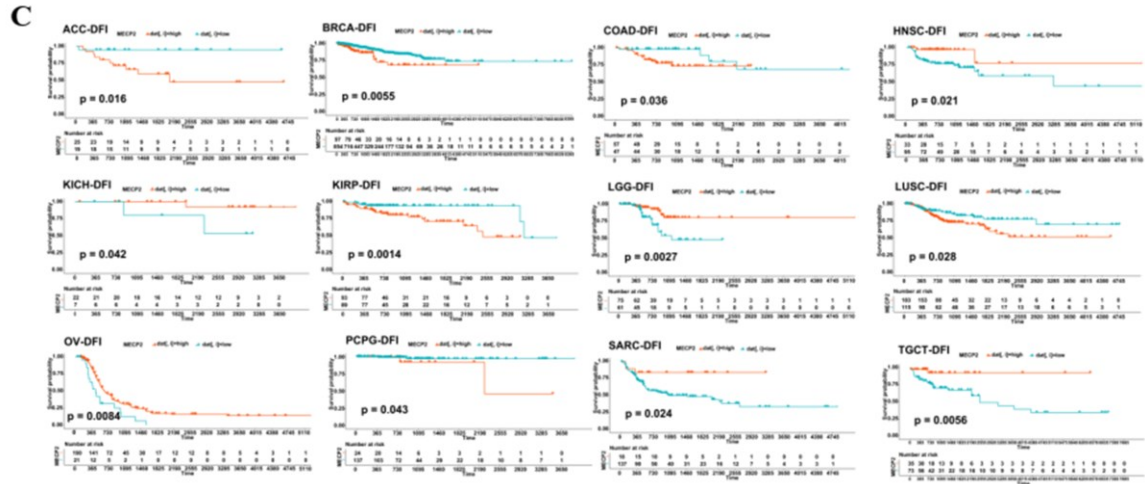

**Figure S3.** The correlation between MeCP2 expression and survival prognosis of pan-cancer. **(A).** DSS analyses of MeCP2 in pan-cancer ( $P < 0.05$ ). **(B).** PFI analyses of MeCP2 in pan-cancer ( $P < 0.05$ ). **(C).** DFI analyses of MeCP2 in pan-cancer ( $P < 0.05$ ). DFI, disease free interval; PFI, progression-free interval; DSS, disease-specific survival.

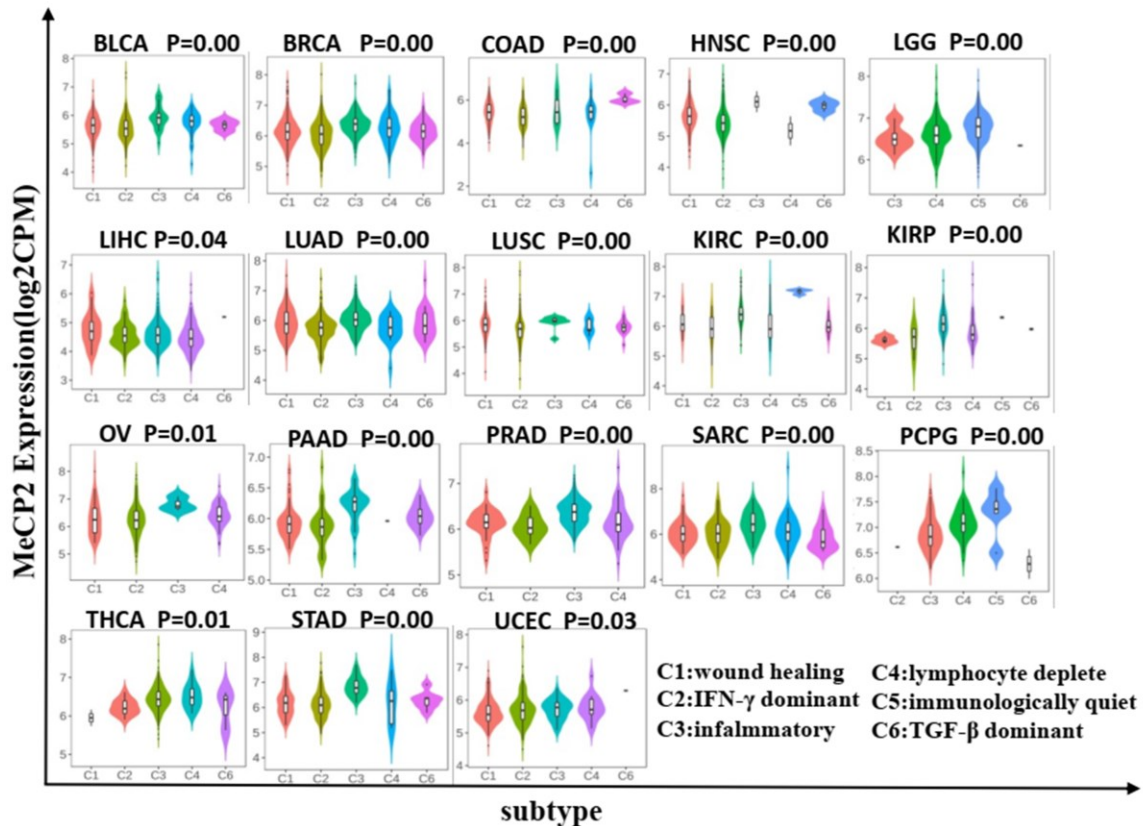

**Figure S4.** Correlation analysis between MeCP2 expression and immune subtype in cancers. A significant correlation between MeCP2 expression and immune subtypes in BLCA, BRCA, COAD, HNSC, LGG, LIHC, LUAD, LUSC, KIRC, KIRP, OV, PAAD, PRAD, SARC, PCPG, THCA, STAD and UCEC.( $P < 0.05$ )

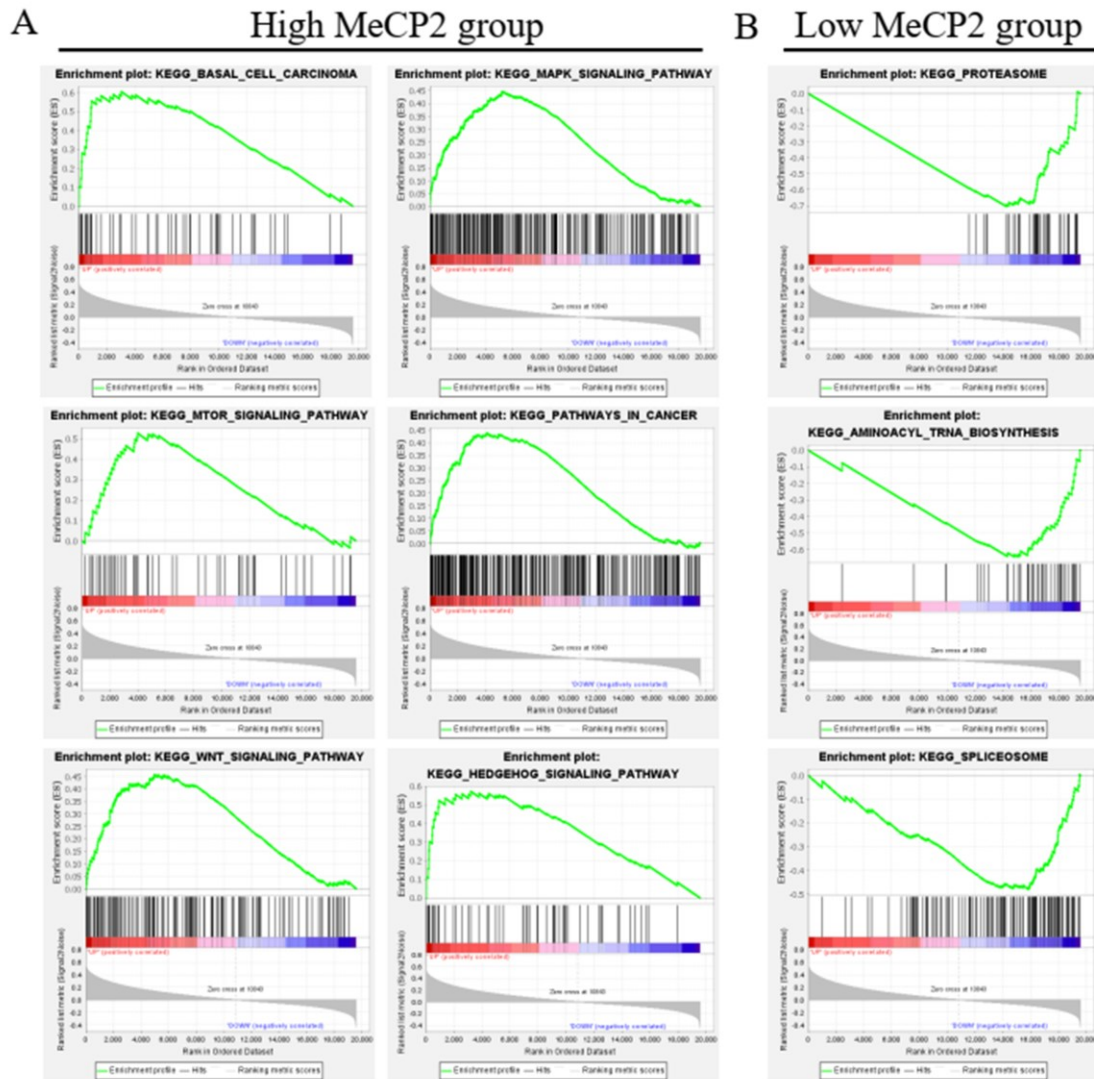

**Figure S5.** GSEA of MeCP2 in STAD.(A). The pathways were enriched in the high MeCP2 group. (B). The pathways were enriched in the low MeCP2 group. GSEA, Gene set enrichment analysis.

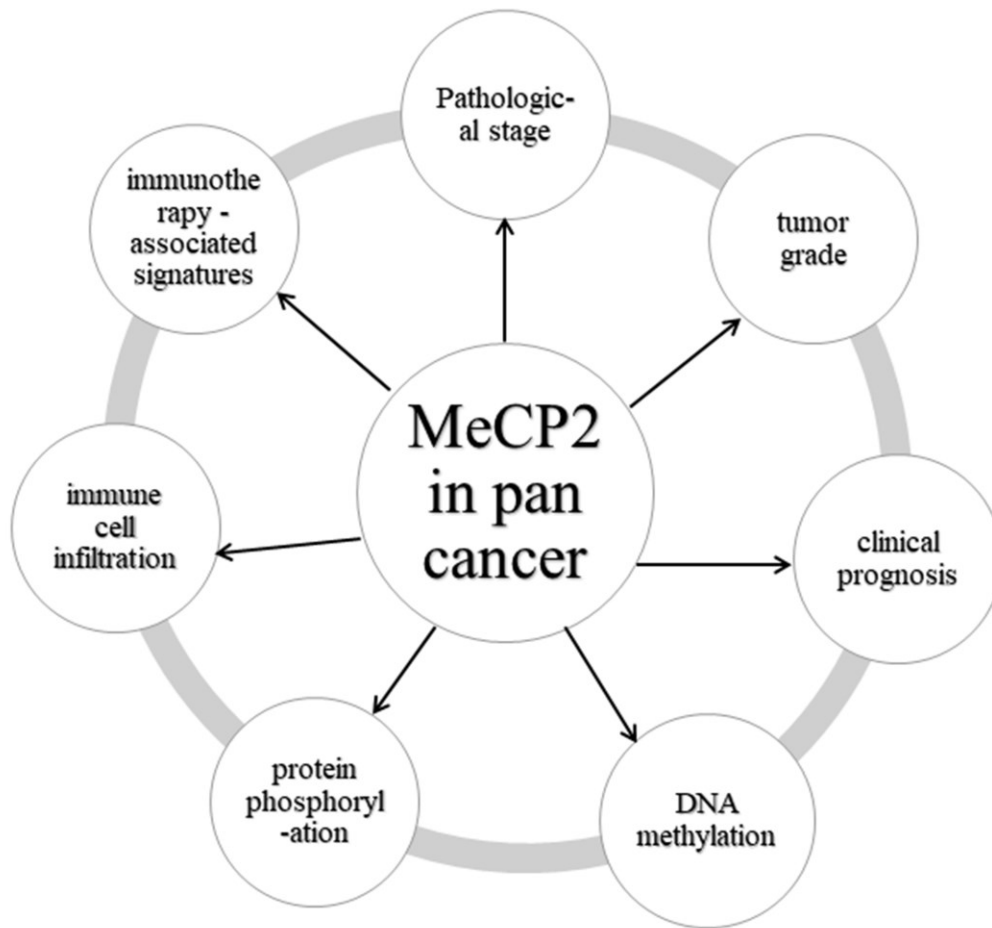

**Figure S6.** The concluding diagram of MeCP2 in pan-cancer.
